# Supplementary material
Source: PubMed Central journal article supplement (PMC3775884)
Supplement: epi-6-188-s01.pdf [file epi-6-188-s01.pdf]

**Supplementary Table 1.** Individual clinical and biomolecular features of the 77 CLL patients included in the study

| Name   | Age | Gender <sup>a</sup> | del(11q22.3) | del(13q14) <sup>b</sup> | del(17p13.1) | +12       | IgVH mutation <sup>c</sup> | IgVH gene usage | CD38+ | ZAP-70+ | Alu <sup>d</sup> | LINE-1 <sup>d</sup> | SAT- $\alpha$ <sup>d</sup> |
|--------|-----|---------------------|--------------|-------------------------|--------------|-----------|----------------------------|-----------------|-------|---------|------------------|---------------------|----------------------------|
| AS0012 | 59  | M                   | -            | + (99.5%)               | -            | -         | mut                        | VH4-34          | -     | -       | 21.0             | 65.3                | 82.6                       |
| BC0035 | 64  | F                   | -            | + (100%)                | -            | -         | mut                        | VH3-7           | -     | -       | 22.4             | 66.8                | 84.1                       |
| CD0018 | 69  | F                   | -            | + (29%)                 | -            | -         | mut                        | VH3-30          | -     | +       | 24.4             | 76.0                | 85.2                       |
| CG0037 | 47  | M                   | -            | -                       | -            | -         | unmut                      | VH3-15          | -     | +       | 24.6             | 78.7                | 86.1                       |
| CS0030 | 60  | M                   | -            | -                       | -            | + (99%)   | unmut                      | VH1-18          | -     | +       | 23.2             | 75.1                | 86.9                       |
| CS0100 | 70  | M                   | -            | + (12.5%) ++ (83.5%)    | -            | -         | mut                        | VH4*02          | -     | -       | 22.5             | 69.1                | 85.4                       |
| CS12   | 68  | M                   | -            | -                       | -            | + (80,5%) | unmut                      | VH3-30          | +     | -       | 23.1             | 60.7                | 87.0                       |
| CS17   | 66  | F                   | -            | -                       | -            | -         | unmut                      | VH3-23          | +     | -       | na               | 61.9                | 61.8                       |
| CS18   | 57  | M                   | -            | -                       | -            | -         | unmut                      | VH3-49          | +     | +       | 12.6             | 39.6                | 42.1                       |
| CS3    | 78  | F                   | -            | + (40%) ++(58%)         | -            | -         | mut                        | VH4-59          | -     | +       | 16.4             | 46.4                | 36.0                       |
| CZ26   | 66  | F                   | -            | -                       | -            | -         | mut                        | VH6-1           | -     | -       | 23.4             | 60.5                | 85.7                       |
| CZ36   | 70  | M                   | -            | + (96%)                 | -            | -         | unmut                      | VH3-53          | -     | -       | 20.4             | 76.5                | 90.1                       |
| CZ41   | 66  | M                   | -            | -                       | -            | -         | mut                        | VH4-34          | -     | -       | 21.8             | 75.2                | na                         |
| CZ78   | 70  | F                   | -            | -                       | -            | -         | unmut                      | VH1-69          | -     | -       | 25.0             | 70.9                | 87.4                       |
| DC0017 | 65  | M                   | + (13%)      | + (38%)                 | -            | -         | mut                        | VH3-53          | -     | -       | 22.1             | 58.6                | 85.6                       |
| EB0042 | 72  | M                   | -            | -                       | -            | -         | mut                        | VH3-7           | +     | -       | 21.9             | 66.4                | na                         |
| FT0019 | 69  | F                   | -            | + (90%)                 | -            | -         | mut                        | VH4*02          | -     | -       | 24.8             | 83.7                | 85.1                       |
| GC0015 | 58  | M                   | -            | -                       | -            | + (94%)   | unmut                      | VH4-39          | -     | +       | 24.7             | 76.3                | 86.8                       |
| GE101  | 63  | M                   | + (100%)     | + (99%)                 | -            | -         | unmut                      | VH3-53          | +     | -       | 18.9             | 74.2                | na                         |
| GE110  | 52  | F                   | -            | + (66%) ++ (33%)        | + (96%)      | -         | mut                        | VH3-23          | -     | -       | 17.1             | 59.6                | 66.5                       |
| GE111  | 67  | M                   | + (61%)      | + (47%)                 | -            | -         | unmut                      | VH1-2           | +     | -       | 25.1             | 61.1                | 86.5                       |
| GE114  | 81  | M                   | -            | -                       | -            | -         | unmut                      | VH1-69          | +     | +       | 24.5             | 67.3                | 86.7                       |
| GE117  | 70  | M                   | -            | -                       | -            | -         | mut                        | VH3-23          | +     | -       | 22.2             | 75.2                | 82.6                       |
| GE118  | 68  | M                   | -            | + (89%)                 | -            | -         | mut                        | VH3-66          | +     | +       | 20.4             | 72.7                | 83.9                       |
| GE126  | 64  | M                   | + (99%)      | + (100%)                | + (100%)     | -         | unmut                      | VH3-7           | -     | +       | 17.7             | 56.4                | 66.6                       |
| GE225  | 66  | M                   | -            | -                       | -            | +         | mut                        | VH4-34          | -     | -       | 22.6             | 73.0                | 84.9                       |
| GE87   | 76  | M                   | -            | -                       | + (100%)     | -         | unmut                      | VH3-11          | +     | -       | 14.8             | 53.3                | 64.3                       |

|        |    |   |          |                  |           |           |       |        |    |    |      |      |      |
|--------|----|---|----------|------------------|-----------|-----------|-------|--------|----|----|------|------|------|
| GE88   | 62 | F | -        | -                | -         | + (40%)   | unmut | VH1-46 | +  | +  | 18.3 | 79.1 | 72.4 |
| GE93   | 58 | M | -        | ++ (98%)         | + (33.5%) | -         | mut   | VH4-74 | -  | -  | 17.9 | 49.6 | 49.3 |
| GE98   | 47 | M | + (21%)  | + (82.5%)        | -         | -         | mut   | VH4-74 | -  | -  | 19.0 | 62.7 | 86.1 |
| GG0027 | 66 | M | -        | + (95%)          | -         | -         | unmut | VH1-18 | +  | +  | 22.1 | 75.4 | 85.7 |
| LL0130 | 52 | M | + (99%)  | + (100%)         | -         | -         | unmut | VH1-69 | +  | +  | 22.4 | 83.3 | 86.5 |
| LD0062 | 48 | M | -        | + (13%) ++ (82%) | -         | -         | mut   | VH4-34 | -  | -  | 23.4 | 80.8 | 84.1 |
| LG0038 | 45 | M | + (100%) | -                | -         | -         | unmut | VH1-2  | +  | +  | 24.9 | 80.8 | 85.4 |
| MC0055 | 53 | F | -        | -                | -         | + (73%)   | unmut | VH1-69 | +  | +  | 22.5 | 68.8 | 84.3 |
| CS103  | 51 | F | -        | -                | + (69%)   | -         | unmut | VH1-69 | na | -  | 17.4 | 41.8 | 26.7 |
| CS89   | 79 | M | -        | ++ (23%)         | + (71%)   | -         | mut   | VH5-5  | na | na | 13.7 | 40.4 | 36.2 |
| CS26   | 67 | F | -        | + (78%)          | -         | -         | unmut | VH2-5  | +  | -  | 23.9 | 64.5 | 86.5 |
| CS128  | 66 | F | -        | + (37%)          | + (100%)  | -         | unmut | VH3-21 | na | na | 18.2 | 61.0 | 58.7 |
| CS115  | 71 | M | -        | -                | + (43%)   | -         | unmut | VH1-69 | na | -  | 15.4 | 42.9 | 24.3 |
| CS71   | 68 | M | -        | -                | + (92%)   | -         | unmut | VH3-7  | na | -  | 16.5 | 52.9 | 56.0 |
| CS95   | 58 | M | + (97%)  | + (98%)          | -         | -         | unmut | VH1-69 | +  | +  | 24.9 | 66.1 | 88.0 |
| NG0068 | 62 | F | -        | -                | -         | + (94%)   | unmut | VH4-39 | +  | +  | 23.2 | 68.0 | 83.5 |
| NI0099 | 69 | F | -        | -                | -         | + (92%)   | unmut | VH4-39 | +  | +  | 23.6 | 66.4 | 85.0 |
| PF0024 | 61 | M | + (51%)  | + (38%)          | -         | -         | unmut | VH3-20 | +  | -  | 24.0 | 71.0 | 86.9 |
| PS0044 | 64 | F | -        | + (100%)         | -         | -         | mut   | VH1-1  | -  | -  | 19.2 | 78.9 | 88.6 |
| RA0023 | 61 | F | -        | -                | -         | + (100%)  | unmut | VH2-5  | +  | +  | 23.0 | 64.5 | 83.9 |
| RF0116 | 70 | F | -        | -                | -         | + (52.5%) | mut   | VH3-7  | -  | -  | 23.8 | 75.1 | 87.4 |
| RC1    | 65 | F | -        | + (97.5%)        | -         | -         | unmut | VH4-59 | -  | +  | 19.1 | 62.5 | 61.4 |
| RC11   | 73 | F | -        | -                | -         | + (56%)   | mut   | VH7-4  | +  | -  | 18.3 | 64.9 | 61.5 |
| RC12   | 27 | M | -        | -                | -         | -         | mut   | VH4-34 | -  | -  | 23.7 | 81.0 | 85.0 |
| RC14   | 87 | F | -        | -                | + (99,5%) | -         | unmut | VH1-2  | -  | -  | 13.5 | 32.2 | 32.7 |
| RC18   | 47 | F | -        | ++ (96%)         | -         | -         | unmut | VH3-21 | +  | +  | 19.4 | 51.7 | 59.2 |
| RC19   | 57 | M | + (88%)  | -                | -         | -         | unmut | VH4-39 | +  | +  | 22.4 | 67.8 | 77.2 |
| RC20   | 51 | F | -        | -                | -         | -         | mut   | VH4-34 | -  | -  | 17.7 | 61.5 | 82.5 |
| RC21   | 80 | M | -        | + (61.5%)        | -         | -         | unmut | VH3-21 | +  | +  | 20.0 | 64.1 | 62.0 |
| RC22   | 71 | M | -        | + (98%)          | -         | -         | unmut | VH1-2  | +  | +  | 16.7 | 68.5 | 86.9 |
| RC24   | 55 | M | + (63%)  | -                | -         | -         | unmut | VH1-69 | +  | +  | 20.9 | 70.8 | 82.3 |
| RC25   | 64 | F | -        | -                | -         | + (92%)   | na    | na     | na | na | 18.2 | 48.9 | 56.3 |

|        |    |   |         |          |         |           |       |        |   |   |      |      |      |
|--------|----|---|---------|----------|---------|-----------|-------|--------|---|---|------|------|------|
| RC33   | 68 | F | -       | -        | -       | + (91%)   | unmut | VH1-69 | + | + | 17.1 | 69.2 | 81.8 |
| RC4    | 54 | F | -       | -        | -       | -         | mut   | VH3-30 | - | - | 17.5 | 50.5 | 73.8 |
| RC5    | 61 | M | + (99%) | -        | -       | -         | unmut | VH3-48 | + | + | 21.0 | 78.1 | na   |
| RC7    | 73 | F | + (99%) | -        | -       | -         | unmut | VH1-69 | - | - | 24.0 | 76.3 | na   |
| RC75   | 78 | F | -       | -        | -       | + (95.5%) | unmut | VH3-30 | + | + | 15.2 | 49.5 | 58.9 |
| RC81   | 86 | M | -       | -        | + (98%) | -         | unmut | VH1-3  | - | - | 18.3 | 62.2 | 63.5 |
| RC84   | 65 | M | -       | -        | -       | + (87.5%) | unmut | VH5-9  | + | - | 25.6 | 65.3 | 87.9 |
| RC87   | 58 | M | -       | + (100%) | -       | -         | unmut | VH1-69 | + | - | 24.6 | 57.3 | 85.4 |
| RC88   | 60 | M | -       | -        | -       | -         | unmut | VH6-1  | - | - | 19.7 | 68.3 | 85.5 |
| RC92   | 64 | M | -       | + (98%)  | -       | -         | unmut | VH3-21 | - | - | 24.5 | 54.8 | 89.5 |
| RC93   | 54 | F | -       | -        | -       | + (97,5%) | mut   | VH4-34 | + | - | 17.5 | 79.9 | 74.2 |
| RC94   | 73 | M | -       | -        | + (96%) | -         | unmut | VH1-69 | - | - | 10.8 | 31.0 | 19.8 |
| SA0093 | 59 | M | + (73%) | -        | -       | -         | unmut | VH3-33 | - | + | 23.6 | 73.6 | 90.2 |
| TS12   | 68 | F | -       | + (98%)  | -       | -         | unmut | VH3-7  | - | - | 15.4 | 69.2 | 83.6 |
| TS3    | 56 | M | -       | -        | -       | + (96,5%) | unmut | VH1-69 | + | - | 25.7 | 74.9 | 87.1 |
| VB0013 | 69 | M | -       | + (72.5) | -       | -         | mut   | VH3-23 | - | - | 20.5 | 66.7 | 81.7 |
| VP0089 | 62 | F | -       | ++ (99%) | -       | -         | mut   | VH5-51 | - | - | 22.9 | 66.8 | 80.4 |
| VS0016 | 64 | M | -       | -        | -       | -         | mut   | VH4-34 | + | - | 18.4 | 72.2 | 84.5 |

<sup>a</sup> M, male; F, female; <sup>b</sup> -, negative;+, positive;++, positive for 13q14 biallelic deletion; <sup>c</sup> mut, mutated; unmut, unmutated; <sup>d</sup> median methylation levels; na, not available

**Supplementary Table 2.** Primers and PCR conditions for DNA methylation analyses of repetitive elements evaluated in the study.

| <b>ID</b>                      | <b>Type</b> | <b>Sequence</b>             | <b>PCR conditions</b>                                        |
|--------------------------------|-------------|-----------------------------|--------------------------------------------------------------|
| <b>Alu</b>                     | F           | b-TTTTTATTAAAAATATAAAAATT   | 96°C for 90'', 43°C for 60'',<br>72°C for 120'', (45 cycles) |
|                                | R           | CCCAAAC TAAAATACAATAA       |                                                              |
|                                | S           | AATAACTAAAATTACAAAC         |                                                              |
| <b>LINE-1</b>                  | F           | TTTTGAGTTAGGTGTGGGATATA     | 95°C for 30'', 50°C for 30'',<br>72°C for 30'', (45 cycles)  |
|                                | R           | b-AAAATCAAAAAATCCCTTTC      |                                                              |
|                                | S           | AGTTAGGTGTGGGATATAGT        |                                                              |
| <b>SAT-<math>\alpha</math></b> | F           | b-TGTAAGTGGATATTTGGATTATTGG | 95°C for 60'', 55°C for 60'',<br>72°C for 60'', (45 cycles)  |
|                                | R           | TTTCCAAAAAAATCTTCAAAAAAAT   |                                                              |
|                                | S           | CTCAAAAATTTCTAAAAATACTTCTC  |                                                              |

F, Forward primer (5' to 3'); R, Reverse primer (5' to 3'); S, Sequencing primer (5' to 3'); b, biotin
